# Supplementary material
Source: PubMed Central journal article supplement (PMC6358018)
Supplement: NIHMS1003375-supplement-Supporting_Information.pdf [file NIHMS1003375-supplement-Supporting_Information.pdf]

## A biosensor strategy for *E. coli* based on ligand-dependent stabilization

Benjamin M. Brandsen,<sup>1</sup> Jordan M. Mattheisen,<sup>1,3</sup> Teia Noel,<sup>1</sup> and Stanley Fields<sup>1-3\*</sup>

1. Department of Genome Sciences, University of Washington, Seattle, WA 98195, USA

2. Department of Medicine, University of Washington, Seattle, WA 98195, USA

3. Howard Hughes Medical Institute, University of Washington, Seattle, WA 98195, USA

### Table of Contents

|                                             |          |
|---------------------------------------------|----------|
| Figure S1.....                              | page S2  |
| Figure S2.....                              | page S3  |
| Figure S3.....                              | page S4  |
| Figure S4.....                              | page S5  |
| Cloning procedures .....                    | page S6  |
| Table S1.....                               | page S8  |
| Table S2.....                               | page S9  |
| References for Supporting Information ..... | page S12 |

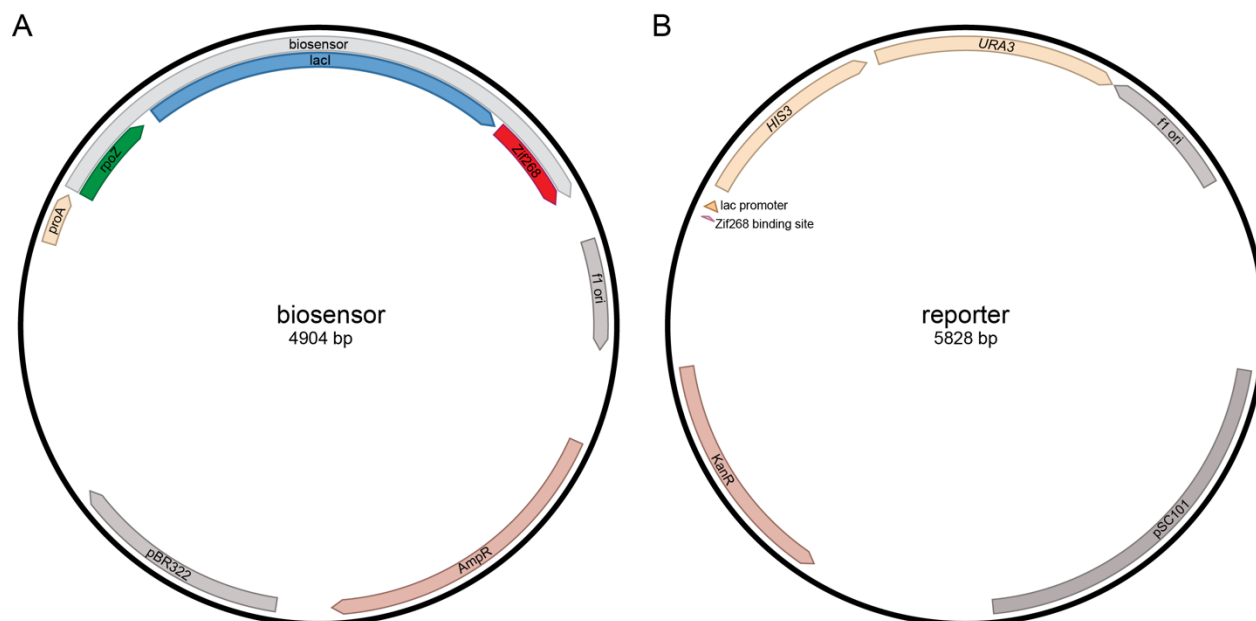

**Figure S1.** Plasmid maps of the biosensor and reporter plasmids. **A.** Map of plasmid encoding LacI-based biosensors and protein fusions. Biosensor expression is driven by the constitutively active *proA* promoter. The amino acid linkers between protein domains were chosen based on the original amino acid linker separating RpoZ and Zif268 in the bacterial one-hybrid assays.<sup>1</sup> The amino acid sequence between RpoZ and LacI is AAADYKDDDDKFRTG, and the amino acid sequence between LacI and Zif268 is SKTPPHGT. **B.** Map of plasmid encoding *HIS3* and *URA3* reporter genes. *HIS3* expression is driven by a weak promoter derived from the native *lac* promoter. The Zif268 binding site is located 10 base pairs upstream of the -35 region of the promoter.

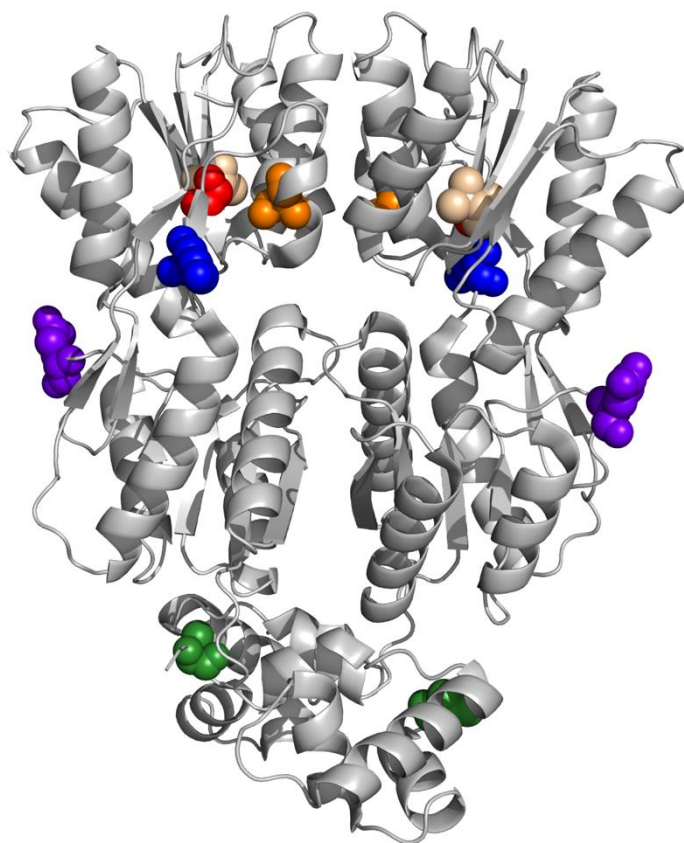

**Figure S2.** Structure of Lacl dimer (taken from a co-crystal with DNA) showing amino acids 1-333 (PDB: 1EFA).<sup>2</sup> The location of the six amino acid mutations in L1.0 colored and shown as spheres (V4L: green; Q153L: violet; V244I: tan; G272R: red; S279R: orange; K290I: blue).

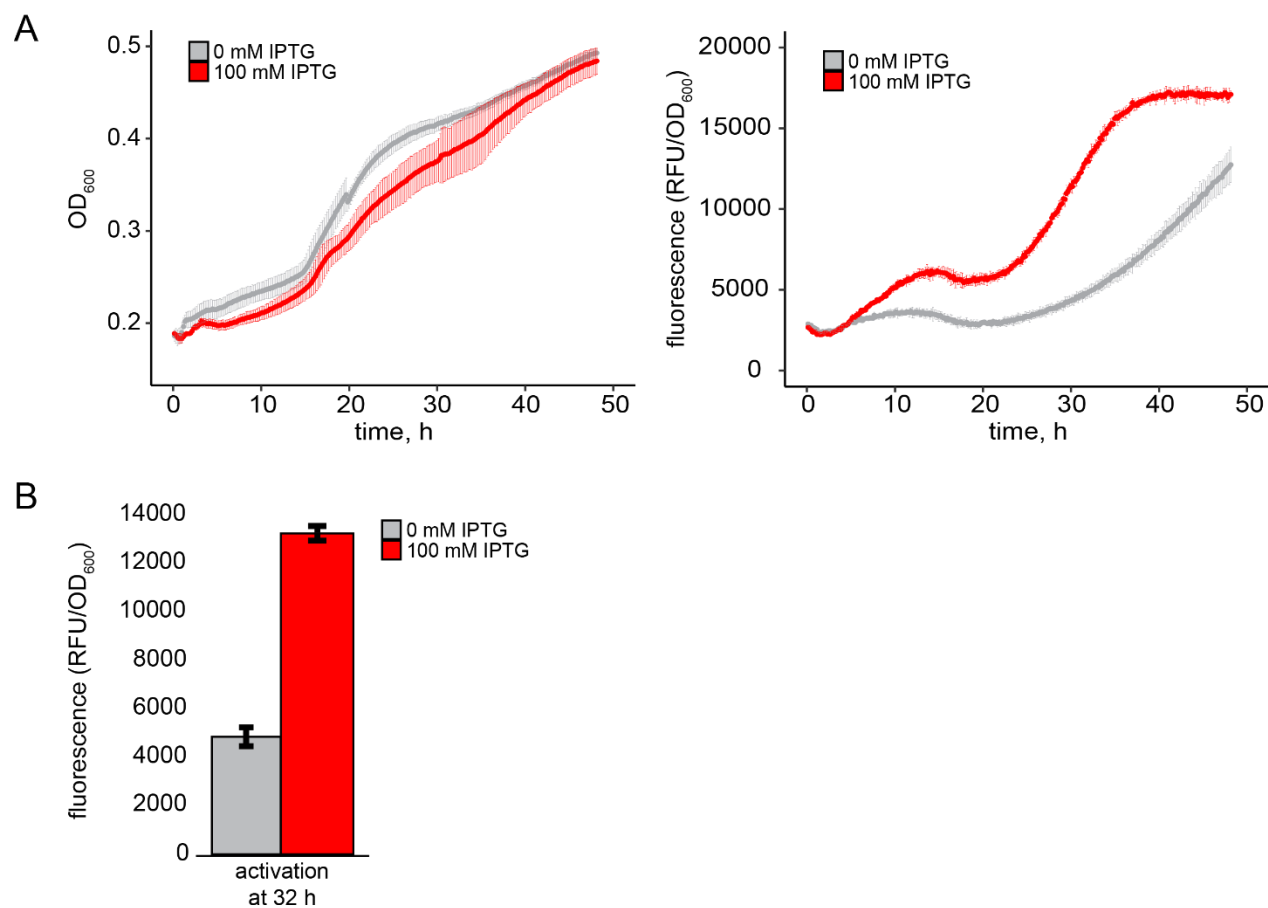

**Figure S3.** Biosensor L1.7-based activation of GFP. **A.** Plots showing OD<sub>600</sub> and OD<sub>600</sub>-normalized GFP with 0 mM and 100 mM IPTG. Each time point shows mean OD<sub>600</sub> or mean fluorescence ( $n = 3$  biological replicates; error bars represent  $\pm$  one standard deviation). **B.** GFP expression at 32 h (from data in panel A). Bar plot shows mean fluorescence ( $n = 3$  biological replicates; error bars represent  $\pm$  one standard deviation).

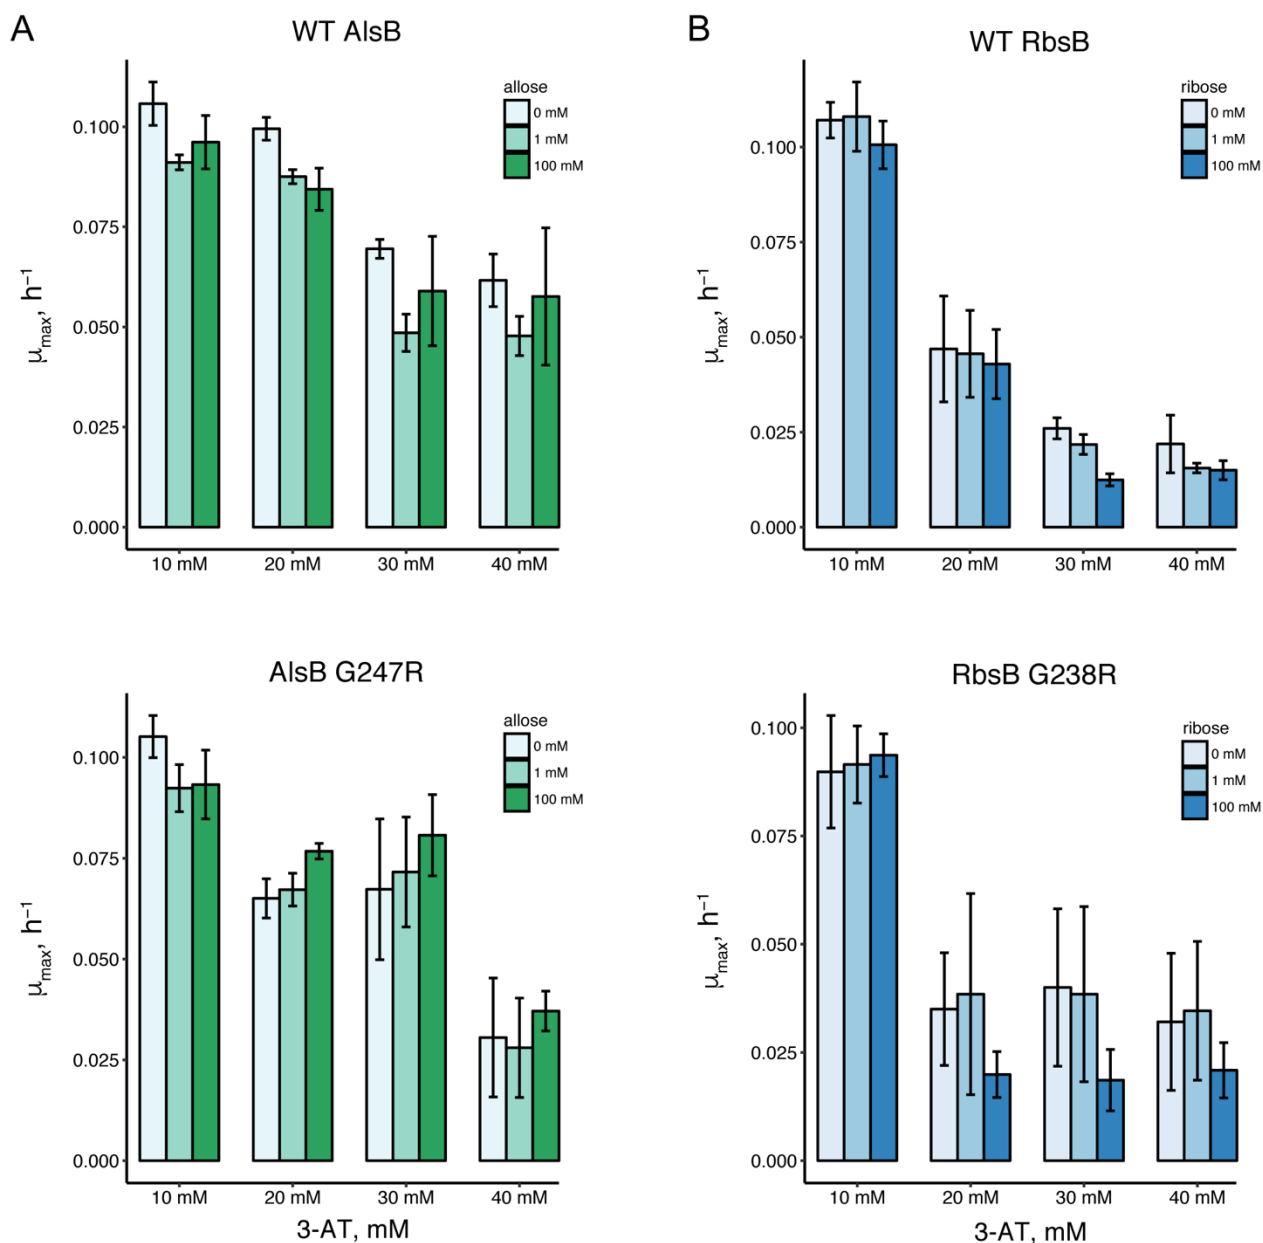

**Figure S4.** Response of protein fusions constructed from periplasmic binding proteins at 10-40 mM 3-AT. **A.** AlsB-based protein fusions induced with 0 mM, 1 mM, and 100 mM D-allose. **B.** RbsB-based protein fusions induced with 0 mM, 1 mM, and 100 mM D-ribose. Bar plots show mean  $\mu_{\max}$  ( $n = 3$  biological replicates; error bars represent  $\pm$  one standard deviation).

## PCR and cloning procedures

### General protocol for Gibson assembly

PCR product was assembled, together with linearized plasmid backbone, using New England Biolabs NEBuilder HiFi DNA Assembly Master Mix in a 10  $\mu$ L reaction, incubating at 50 °C for 1 h. 2  $\mu$ L of this product was transformed into chemically competent DH10B cells, and plasmid selection was performed on agar plates with LB supplemented with appropriate antibiotic. Plasmids were isolated using a Qiagen Qiaprep Spin Miniprep kit, and correct assembly of the desired biosensor construct was verified by Sanger sequencing.

*Protocol for linearizing pB1H2 $\omega$ 2-Zif268:* pB1H2 $\omega$ 2-Zif268 was linearized by inverse PCR with primers pB1H2 $\omega$ 2\_Zif268 F and pB1H2 $\omega$ 2\_Zif268 R using Kappa HiFi 2 $\times$  Master Mix. The PCR product was desalted and concentrated using the Zymo Clean and Concentrate Kit, eluted into water, and used for cloning biosensors.

*Protocol for cloning RpoZ-LacI-Zif268, RpoZ-AlsB-Zif268, and RpoZ-RbsB-Zif268:* Each ligand binding domain was PCR amplified using primers that contain regions of homology for cloning by Gibson assembly. The PCR product was assembled with linearized pB1H2 $\omega$ 2-Zif268 using Gibson assembly.

*Protocol for cloning proA constitutive promoter into L1.0:* The *proA* promoter sequence containing 30 bp of homology to the adjacent regions of the transcriptional activator construct was synthesized as a gBlock by IDT. Together with L1.0 linearized by inverse PCR using primers BMB D133 and BMB D134 to remove the lac promoter and operator, this gBlock was assembled using Gibson assembly.

*Protocol for reverting single amino acid mutations in L1.0 to generate L1.1-L1.6:* L1.1 was generated by PCR amplification of the L1.0 ligand-binding domain with primers BMB D006 and BMB D007, and subsequently assembled with linearized pB1H2 $\omega$ 2-Zif268 using Gibson assembly. L1.2-L1.6 were generated using overlapping PCR primers, together with primers BMB D012 and BMB D013, to generate two overlapping PCR products of the L1.0 ligand-binding domain with the corresponding amino acid reverted back to its wild type identity. These two overlapping PCR products were assembled with linearized pB1H2 $\omega$ 2-Zif268 using Gibson assembly.

### General protocol for inverse PCR

Two primers annealing adjacent to one another and oriented in opposite directions were used to introduce point mutations by PCR. Briefly, a 50  $\mu$ L reaction containing 25 pmol of each primer, 1 ng of plasmid template, 250  $\mu$ M dNTPs, 10  $\mu$ L of 5 $\times$  Phusion HF buffer, and 0.5  $\mu$ L of Phusion polymerase was thermocycled for 25 cycles according to the following PCR protocol: 95 °C for 30 s, 24 $\times$  (95 °C for 10 s, 65 °C for 10 s, 72 °C for 90 s), 72 °C for 4 min. The PCR product was assessed for correct size and lack of side products by running on a 1% agarose gel. A 20  $\mu$ L reaction containing 4  $\mu$ L of PCR product, 2  $\mu$ L of 10 $\times$  T4 DNA ligase buffer, and 1  $\mu$ L of each DpnI, T4 PNK, and T4 DNA ligase was incubated at room temperature for 1 h. 2  $\mu$ L of this product was transformed into chemically competent DH10B cells, and cells harboring plasmid were selected by plating on agar plates of LB supplemented with appropriate antibiotic. Plasmids were isolated using a Qiagen Qiaprep Spin Miniprep kit, and correct introduction of the desired mutation was verified by Sanger sequencing.

*L1.7:* L1.7 was generated by inverse PCR using primers BMB D104 and BMB D105 and RpoZ-LacI-Zif268 as template.

*L1.7 + Q291T*: L1.7 + Q291T was generated by inverse PCR using primers BMB D145 and BMB D146 and L1.7 as template.

*Zif268 binding site mutant 1*: Zif268 binding site mutant 1 was generated by inverse PCR using primers BMB D020 and BMB D019 and pH3U3-Zif268 as template.

*Zif268 binding site mutant 2*: Zif268 binding site mutant 2 was generated by inverse PCR using primers BMB D021 and BMB D019 and pH3U3-Zif268 as template.

*Zif268 binding site mutant 3*: Zif268 binding site mutant 3 was generated by inverse PCR using primers BMB D018 and BMB D019 and pH3U3-Zif268 as template.

*RpoZ-AlsB G247R-Zif268*: RpoZ-AlsB G247R-Zif268 was generated by inverse PCR using primers BMB D180 and BMB D181 and RpoZ-AlsB-Zif268 was template.

*RpoZ-RbsB G238R-Zif268*: RpoZ-RbsB G238R-Zif268 was generated by inverse PCR using primers BMB D186 and BMB D187 and RpoZ-RbsB-Zif268 was template.

#### Cloning of the library of MphR variants

*Protocol for cloning erythromycin resistance gene into the biosensor backbone*: The erythromycin resistance cassette *eryR* was PCR amplified from plasmid pJKR-H-mphR<sup>3</sup> using primers BMB D082 and BMB D083 and Kappa HiFi 2× Master Mix. Plasmid pB1H2ω2-Zif268 was linearized using EcoRI and desalted and concentrated using the Zymo Clean and Concentrate Kit. The PCR product and linearized vector were cloned using Gibson assembly.

*Protocol for cloning mphR into the biosensor\_eryR backbone*: Plasmid pB1H2ω2-Zif268\_eryR was linearized by inverse PCR with primers pB1H2ω2\_Zif268 F and pB1H2ω2\_Zif268 R using Kappa HiFi 2× Master Mix. The PCR product was desalted and concentrated using the Zymo Clean and Concentrate Kit. The *mphR* gene was PCR-amplified from plasmid plasmid pJKR-H-mphR using primers mphR\_F and mphR\_R, and cloned into linearized pB1H2ω2-Zif268\_eryR using Gibson assembly.

*Protocol for cloning the library of MphR variants*: Error-prone PCR was performed using the MphR biosensor plasmid and primers BMB D012 and BMB D013 as described for the *lacI* gene. This PCR product was cloned into linearized pB1H2ω2-Zif268\_eryR using Gibson assembly.

*Transformation of the library of MphR variants*: Gibson assembly product of MphR was desalted and concentrated using the Zymo Clean and Concentrate Kit. Invitrogen Electromax DH10B *E. coli* cells were transformed by electroporation with the Gibson assembly product and recovered in 1 mL of SOC shaking at 37 °C for 1 h. 1% and 0.1% of cells were plated on LB+Amp plates to estimate the number of unique transformants, and the remainder of the cells were grown overnight at 37 °C in 100 mL of LB supplemented with 100 µg/mL of carbenicillin. Plasmid was isolated from 5 mL of culture using the Qiagen miniprep kit.

200 ng of plasmid containing the error-prone PCR library plasmid was cotransformed with 200 ng of pH3U3-Zif268 (omega) into 200 µL of electrocompetent US0 *hisB*Δ *pyrF*Δ *rpoZ*Δ cells in four 50 µL transformations. The cells from each transformation were recovered by shaking in 1 mL of SOC media for 1 h at 37 °C. 1% of cells was plated on LB plates supplemented with ampicillin and kanamycin to estimate the number of unique colonies from the library transformation. The rest of the transformation was grown overnight at 37 °C in LB media supplemented with ampicillin and kanamycin, and frozen in 25% glycerol for use in subsequent selection experiments as described in the Materials and Methods section of the main text.

| Plasmid                                    | Antibiotic resistance marker | Description                                                                                  |
|--------------------------------------------|------------------------------|----------------------------------------------------------------------------------------------|
| pB1H2ω2-Zif268                             | Ampicillin                   | RpoZ-Zif268 direct fusion; mutated <i>lacUV5</i> promoter                                    |
| pB1H2ω2-Lacl-Zif268                        | Ampicillin                   | RpoZ-Lacl-Zif268; mutated <i>lacUV5</i> promoter                                             |
| pB1H2ω2-L1.0-Zif268                        | Ampicillin                   | RpoZ-L1.0-Zif268 biosensor; mutated <i>lacUV5</i> promoter                                   |
| pB1H2ω2-Lacl-Zif268_ proA                  | Ampicillin                   | RpoZ-Lacl-Zif268; <i>proA</i> constitutive promoter                                          |
| L1.0 biosensor                             | Ampicillin                   | RpoZ-L1.0-Zif268 biosensor; <i>proA</i> constitutive promoter                                |
| L1.0 (rpoZΔ) biosensor                     | Ampicillin                   | RpoZ-L1.0-Zif268 biosensor; <i>proA</i> constitutive promoter                                |
| L1.1 biosensor                             | Ampicillin                   | RpoZ-L1.1-Zif268; V4L revert biosensor, <i>proA</i> constitutive promoter                    |
| L1.2 biosensor                             | Ampicillin                   | RpoZ- L1.2-Zif268 Q153L revert biosensor, <i>proA</i> constitutive promoter                  |
| L1.3 biosensor                             | Ampicillin                   | RpoZ- L1.3-Zif268 V244I revert biosensor, <i>proA</i> constitutive promoter                  |
| L1.4 biosensor                             | Ampicillin                   | RpoZ- L1.4-Zif268 G272R revert biosensor, <i>proA</i> constitutive promoter                  |
| L1.5 biosensor                             | Ampicillin                   | RpoZ-L1.5-Zif268 S279R revert biosensor, <i>proA</i> constitutive promoter                   |
| L1.6 biosensor                             | Ampicillin                   | RpoZ-L1.6-Zif268 K290I revert biosensor, <i>proA</i> constitutive promoter                   |
| L1.7 biosensor                             | Ampicillin                   | RpoZ-L1.7-Zif268; <i>proA</i> constitutive promoter                                          |
| pH3U3-Zif268 (omega)                       | Kanamycin                    | Reporter with Zif268 DNA binding site upstream of <i>HIS3</i>                                |
| pH3U3-Zif268 (omega)_GFP                   | Chloramphenicol              | Reporter with Zif268 DNA binding site upstream of sfGFP                                      |
| pH3U3-Zif268 (omega)_binding site mutant 1 | Kanamycin                    | Reporter with mutated Zif268 binding site upstream of <i>HIS3</i> ; binding site = GCGTGGGag |
| pH3U3-Zif268 (omega)_binding site mutant 2 | Kanamycin                    | Reporter with mutated Zif268 binding site upstream of <i>HIS3</i> ; binding site = GCGTGGGca |
| pH3U3-Zif268 (omega)_binding site mutant 3 | Kanamycin                    | Reporter with mutated Zif268 binding site upstream of <i>HIS3</i> ; binding site = GCGTGGGgG |
| L1.7 biosensor + Q291T                     | Ampicillin                   | RpoZ-L1.7 Q291T-Zif268; <i>proA</i> constitutive promoter                                    |
| RpoZ-Lacl Q291T-Zif268                     | Ampicillin                   | RpoZ-Lacl Q291T-Zif268; <i>proA</i> constitutive promoter                                    |
| RpoZ-AlsB-Zif268 fusion                    | Ampicillin                   | RpoZ-AlsB-Zif268; <i>proA</i> constitutive promoter                                          |
| RpoZ-AlsB G247R-Zif268 fusion              | Ampicillin                   | RpoZ-AlsB G247R-Zif268; <i>proA</i> constitutive promoter                                    |
| RpoZ-RbsB-Zif268 fusion                    | Ampicillin                   | RpoZ-RbsB-Zif268; <i>proA</i> constitutive promoter                                          |
| RpoZ-RbsB G238R-Zif268 fusion              | Ampicillin                   | RpoZ-RbsB G238R-Zif268; <i>proA</i> constitutive promoter                                    |
| RpoZ-MphR-Zif268                           | Ampicillin                   | RpoZ-MphR-Zif268; mutated <i>lacUV5</i> promoter                                             |
| RpoZ-M1.0-Zif268                           | Ampicillin                   | RpoZ-M1.0-Zif268; mutated <i>lacUV5</i> promoter                                             |

**Table S1.** Plasmids used in this study.



| Oligonucleotide  | Purpose                                                                                           | DNA Sequence                                                                                                                                                                        |
|------------------|---------------------------------------------------------------------------------------------------|-------------------------------------------------------------------------------------------------------------------------------------------------------------------------------------|
| pB1H2ω2_Zif268 F | Inverse PCR of pB1H2ω2_Zif268 to insert ligand-binding domain between RpoZ and Zif268             | TCCAAGACACCCCCCATGGTACC                                                                                                                                                             |
| pB1H2ω2_Zif268 R | Inverse PCR of pB1H2ω2_Zif268 to insert ligand-binding domain between RpoZ and Zif268             | ACCGGTCCGGAACCTTGTCGTCGTC                                                                                                                                                           |
| BMB D006         | Amplification of LacI from pGEX-4T2 and cloning by Gibson assembly into linearized pB1H2ω2-Zif268 | AAGGATGACGACGACAAGTTCCGGACCGGTgtgaa<br>accagtaacgttatacgatgctgca                                                                                                                    |
| BMB D007         | Amplification of LacI from pGEX-4T2 and cloning by Gibson assembly into linearized pB1H2ω2-Zif268 | TGGGCGGGTACCATGGGGGGGTGTCTTGGAActgcc<br>cgctttccagtcgggaaac                                                                                                                         |
| BMB D012         | Error-prone PCR of LacI in RpoZ-LacI-Zif268 fusion; reversion of single AA mutations              | GACGACGACAAGTTCCGGACCGGT                                                                                                                                                            |
| BMB D013         | Error-prone PCR of LacI in RpoZ-LacI-Zif268 fusion; reversion of single AA mutations              | GGTACCATGGGGGGGTGTCTTGGA                                                                                                                                                            |
| proA promoter    | proA constitutive promoter for biosensor expression (synthesized as gBlock)                       | CACAGCTAACACCACGTCGTCCTATCTGCTGCC<br>CTAGGTCTATGAGTGGTTGCTGGATAACTTTACG<br>GGCATGCATAAGGCTCGtaggctATATTCAGGGAGA<br>CCACAACGGTTTTCCCTCTACAAATAATTTTGTTTA<br>ACTTTTCACACAGGAAAGtactag |
| BMB D133         | Linearization of biosensor plasmid to clone <i>proA</i> promoter                                  | ATGGCACGCGTAACTGTTTCAGGACG                                                                                                                                                          |
| BMB D134         | Linearization of biosensor plasmid to clone <i>proA</i> promoter                                  | CCGTTCCAGTAACCGGGCATGTTC                                                                                                                                                            |
| BMB D064         | Reversion of Q153L mutation in L1.0                                                               | CTTGATGTCTCTGACCaGACACCCATCAACAGT                                                                                                                                                   |
| BMB D065         | Reversion of Q153L mutation in L1.0                                                               | ACTGTTGATGGGTGTCtGGTCAGAGACATCAAG                                                                                                                                                   |
| BMB D066         | Reversion of V244I mutation in L1.0                                                               | ACTGCGATGCTGgTTGCCAACGATCA                                                                                                                                                          |
| BMB D067         | Reversion of V244I mutation in L1.0                                                               | TGATCGTTGGCAAcCAGCATCGCAGT                                                                                                                                                          |

|          |                                                                                                                |                                                                   |
|----------|----------------------------------------------------------------------------------------------------------------|-------------------------------------------------------------------|
| BMB D068 | Reversion of G272R mutation in L1.0                                                                            | CGGATATCTCGGTAGTGgGATACGACGATACCGA                                |
| BMB D069 | Reversion of G272R mutation in L1.0                                                                            | TCGGTATCGTCGTATCcCACTACCGAGATATCCG                                |
| BMB D070 | Reversion of S279R mutation in L1.0                                                                            | CGATACCGAAGACAGcTCATGTTATATCCCCG                                  |
| BMB D071 | Reversion of S279R mutation in L1.0                                                                            | GCGGGATATAACATGAgCTGTCTTCGGTATCG                                  |
| BMB D072 | Reversion of K290I mutation in L1.0                                                                            | CGTTAACCACCATCAaACAGGATTTTCGCCTG                                  |
| BMB D073 | Reversion of K290I mutation in L1.0                                                                            | CAGGCGAAAATCCTGTtTGATGGTGGTTAACG                                  |
| BMB D104 | Introduction of G272R mutation in RpoZ-Lacl-Zif268                                                             | CGGATATCTCGGTAGTGaGATACGACGATACCGA                                |
| BMB D105 | Introduction of G272R mutation in RpoZ-Lacl-Zif268                                                             | TCGGTATCGTCGTATctCACTACCGAGATATCCG                                |
| BMB D020 | Zif268 binding site mutant 1 in pH3U3-Zif268 (omega)                                                           | GCTGCGTGGGaGGGACGAATTC                                            |
| BMB D021 | Zif268 binding site mutant 2 in pH3U3-Zif268 (omega)                                                           | GCTGCGTGGGcaGGACGAATTCTTTAC                                       |
| BMB D018 | Zif268 binding site mutant 3 in pH3U3-Zif268 (omega)                                                           | GCTGCGTGGGgGGGACGAATTC                                            |
| BMB D019 | All mutated Zif268 binding sites in pH3U3-Zif268 (omega)                                                       | GGCCGCCCGGGTGTACAC                                                |
| BMB D145 | Introduction of Q291T mutation in L1.7                                                                         | CACCATCAAaaccGATTTTCGCCTGCTG                                      |
| BMB D146 | Introduction of Q291T mutation in L1.7                                                                         | GTTAACGGCGGGATATAAC                                               |
| BMB D166 | Amplification of AlsB from <i>E. coli</i> genome and cloning by Gibson assembly into linearized pB1H2ω2-Zif268 | AAGGATGACGACGACAAGTTCCGGACCGGTAATA<br>AATATCTGAAATATTTTCAGCGGCACA |
| BMB D167 | Amplification of AlsB from <i>E. coli</i> genome and cloning by Gibson assembly into linearized pB1H2ω2-Zif268 | TGGGCGGGTACCATGGGGGGGTGTCTTGGATTG<br>AGTGACCAGGATTGAATCGAC        |
| BMB D180 | Introduction of G247R mutation in RpoZ-AlsB-Zif268 fusion                                                      | GCTGGTCGTcaggACAGATGGCA                                           |

|          |                                                                                                                |                                                                |
|----------|----------------------------------------------------------------------------------------------------------------|----------------------------------------------------------------|
| BMB D181 | Introduction of G247R mutation in RpoZ-AlsB-Zif268 fusion                                                      | ACTTTTCCCGTTTTTCCGG                                            |
| BMB D174 | Amplification of RbsB from <i>E. coli</i> genome and cloning by Gibson assembly into linearized pB1H2ω2-Zif268 | AAGGATGACGACGACAAGTTCCGGACCGGTAAC<br>ATGAAAAAACTGGCTACCCTGG    |
| BMB D175 | Amplification of RbsB from <i>E. coli</i> genome and cloning by Gibson assembly into linearized pB1H2ω2-Zif268 | TGGGCGGGTACCATGGGGGGGTGTCTTGGACTG<br>CTTAACAACCAGTTTCAGATCAAC  |
| BMB D186 | Introduction of G238R mutation in RpoZ-RbsB-Zif268 fusion                                                      | GATGGTCGTCaggTTTGACGGTAC                                       |
| BMB D187 | Introduction of G238R mutation in RpoZ-RbsB-Zif268 fusion                                                      | ACATCCGATTTACCGGCA                                             |
| BMB D082 | Amplification of <i>eryR</i> from pJKR-H-mphR and cloning by Gibson assembly into pB1H2ω2-Zif268               | TGAACATGCCCGGTTACTGGAACGGGAATTgcttgg<br>attctcaccaataaaaaacgcc |
| BMB D083 | Amplification of <i>eryR</i> from pJKR-H-mphR and cloning by Gibson assembly into pB1H2ω2-Zif268               | CCGGAAGCATAAAGTGTAAGCCCGGAATTcaaaa<br>aaccctcaagaccgtagag      |
| mphR_F   | Amplification of <i>mphR</i> from pJKR-H-mphR and cloning by Gibson assembly into pB1H2ω2-Zif268_eryR          | AAGGATGACGACGACAAGTTCCGGACCGGTATG<br>CCGCGTCCGAAACTGAAATCT     |
| mphR_R   | Amplification of <i>mphR</i> from pJKR-H-mphR and cloning by Gibson assembly into pB1H2ω2-Zif268_eryR          | TGGGCGGGTACCATGGGGGGGTGTCTTGGACGC<br>GTGCGGCTGCAGCAGCTGGAA     |

**Table S2.** Oligonucleotides used in this study.

References for Supporting Information

1. Noyes, M. B., Meng, X., Wakabayashi, A., Sinha, S., Brodsky, M. H., and Wolfe, S. A. (2008) A systematic characterization of factors that regulate *Drosophila* segmentation via a bacterial one-hybrid system, *Nucleic Acids Res.* 36, 2547-2560.
2. Bell, C. E., and Lewis, M. (2000) A closer view of the conformation of the Lac repressor bound to operator, *Nat. Struct. Biol.* 7, 209-214.
3. Rogers, J. K., Guzman, C. D., Taylor, N. D., Raman, S., Anderson, K., and Church, G. M. (2015) Synthetic biosensors for precise gene control and real-time monitoring of metabolites, *Nucleic Acids Res.* 43, 7648-7660.
